# Supplementary material
Source: PubMed Central journal article supplement (PMC7368346)
Supplement: zsz056_suppl_supplementary_materials.pdf [file zsz056_suppl_supplementary_materials.pdf]

# Surgical Manual of Procedures

|                                                         |           |
|---------------------------------------------------------|-----------|
| <b>SUMMARY OF TRIAL VISITS .....</b>                    | <b>2</b>  |
| <b>TRIAL ELIGIBILITY CRITERIA.....</b>                  | <b>3</b>  |
| <b>SURGICAL ELIGIBILITY .....</b>                       | <b>3</b>  |
| <b>SCREENING MEASUREMENTS .....</b>                     | <b>4</b>  |
| MODIFIED FRIEDMAN STAGING SYSTEM .....                  | 4         |
| FUNCTIONAL NASAL ASSESSMENT .....                       | 5         |
| FIBREOPTICPHARYNGOSCOPY (NASENOSCOPY) MANOEUVRES.....   | 6         |
| <b>SURGICAL PROCEDURES .....</b>                        | <b>8</b>  |
| ANAESTHESIA .....                                       | 8         |
| BILATERAL TONSILLECTOMY AND MODIFIED UPPP .....         | 8         |
| <i>Additional References</i> .....                      | 8         |
| COBLATION CHANNELLING OF THE TONGUE (CCT) .....         | 18        |
| <b>PERIOPERATIVE CARE PROTOCOLS .....</b>               | <b>21</b> |
| PRE-OPERATIVE .....                                     | 21        |
| <i>Medications</i> .....                                | 21        |
| POST-OPERATIVE .....                                    | 21        |
| <i>Medications</i> .....                                | 22        |
| <i>Post-operative expectations</i> .....                | 22        |
| ADVERSE EVENTS .....                                    | 23        |
| <i>Post-op</i> .....                                    | 23        |
| <i>Transient at 1 Month to 3 months</i> .....           | 23        |
| <i>Persistent at 3 Months and beyond 6 months</i> ..... | 23        |
| BLEEDING GRADES.....                                    | 24        |
| SERIOUS ADVERSE EVENTS .....                            | 25        |
| <i>Recording and Reporting Adverse Events</i> .....     | 25        |

All videos referenced in this document can be downloaded via this web link:

<https://www.dropbox.com/s/5aethp5s783h4po/Surgical%20videos%20for%20manual.pptx>

## Summary of Trial Visits

|                                    |                                                                                         | PROCEDURE                                                                                      | DURATION                                    |
|------------------------------------|-----------------------------------------------------------------------------------------|------------------------------------------------------------------------------------------------|---------------------------------------------|
| Pre-Trial Screening                | Visit 1                                                                                 | Appointment with research assistant                                                            | 15 mins                                     |
|                                    | Visit 2                                                                                 | Appointment with sleep physician                                                               | 30 mins                                     |
|                                    |                                                                                         | <b>TRIAL CONSENT TAKEN</b>                                                                     |                                             |
|                                    |                                                                                         | <b>MBS-PBS CONSENT TAKEN</b>                                                                   |                                             |
|                                    |                                                                                         | -> possible lateral skull x-ray                                                                | 15 mins                                     |
|                                    | -> PSG for eligibility (if patient has not had a lab-attended PSG within last 3 months) | Overnight                                                                                      |                                             |
|                                    | Visit 2A                                                                                | Appointment with sleep physician<br>(only if had PSG &/or lateral skull x-ray for eligibility) | 15 mins                                     |
|                                    | Visit 3                                                                                 | Appointment with surgeon                                                                       | 15 mins                                     |
| Randomisation                      | Telephone                                                                               |                                                                                                |                                             |
| Baseline Measures and Intervention | Visit 4                                                                                 | Appointment with research assistant                                                            | 60 mins                                     |
|                                    |                                                                                         | Blood pressure monitor                                                                         | Wear 24hrs                                  |
|                                    |                                                                                         | Actigraphy with sleep diary (lead up to MSLT)                                                  | 5 – 7 days                                  |
|                                    |                                                                                         | Sleepiness assessment MSLT                                                                     | 8 hours                                     |
|                                    |                                                                                         | MRI (Surgical Intervention only)                                                               | 1 hour                                      |
|                                    |                                                                                         | <b>Surgery</b>                                                                                 | <b>Surgery (Surgical Intervention only)</b> |
|                                    | <b>Extra Visit</b>                                                                      | Post-op, only if required (Surgical Intervention only)                                         | 15 mins                                     |
| 1 Month Follow-up                  | Visit 5                                                                                 | Appointment with research assistant                                                            | 15 mins                                     |
|                                    | Visit S1                                                                                | Appointment with surgeon (Surgical Intervention only)                                          | 15 mins                                     |
|                                    | Visit 6                                                                                 | Appointment with sleep physician                                                               | 15 mins                                     |
| 3 Month Follow-up                  | Visit 7                                                                                 | Appointment with research assistant                                                            | 20 mins                                     |
|                                    | Visit S3                                                                                | Appointment with surgeon (Surgical Intervention only)                                          | 15 mins                                     |
|                                    | Visit 8                                                                                 | Appointment with sleep physician                                                               | 10 mins                                     |
| 6 Month Follow-up                  | Visit 9                                                                                 | Appointment with research assistant                                                            | 60 mins                                     |
|                                    |                                                                                         | Blood pressure monitor                                                                         | Wear 24hrs                                  |
|                                    |                                                                                         | Sleep study                                                                                    | overnight                                   |
|                                    |                                                                                         | Sleepiness assessment MSLT (day after PSG)                                                     | 8 hours                                     |
|                                    |                                                                                         | MRI (Surgical Intervention only)                                                               | 1 hour                                      |
|                                    |                                                                                         | Visit 10                                                                                       | Appointment with sleep physician            |
|                                    | Visit S6                                                                                | Appointment with surgeon (Surgical Intervention only)                                          | 15 mins                                     |

## Trial Eligibility Criteria

### Inclusion Criteria

- a. Diagnosis of OSA (defined as Apnoea Hypopnoea Index, AHI > 15 scored by AASM 2007 alternate criteria).
- b. At least mild daytime sleepiness defined as ESS > 8. We used this cut point to target those with at least mild daytime sleepiness, but consider that the requirement for the ESS to be > 8 will not adversely affect recruitment.
- c. Failed CPAP treatment despite persistent, supervised attempts to implement CPAP, or been treated in a tertiary centre sleep lab or by an Australasian Sleep Association accredited sleep service and have not taken up CPAP when prescribed, and failed MAS therapy due to patient refusal, patient found to be unsuitable on dental grounds, patient intolerance, or were never offered MAS as a treatment option.
  - i. CPAP treatment reduces AHI to below 15 events per hour of sleep (N/A for outright refusers of CPAP).
- d. Aged between 18 and 70 years inclusive.
- e. Body mass index (BMI)  $\leq 38\text{kg/m}^2$ .
  - i. For patients with BMI 35-38: patient will be deemed appropriate provided they are of strong surgical/anatomical suitability, which consists of size 3-4 tonsil, with Friedman tongue 1-2, and dynamic assessment confirming predominant palatine tonsillar collapse

### Exclusion criteria

1. Prior surgery on palate, tongue, mandible or maxilla. Previous tonsillectomy is allowed.
2. Nasal obstruction uncontrolled by medication or surgery.
3. Clinically significant retrognathia, confirmed by lateral skull x-ray (SNB angle < 72°)
4. Moderate to severe COPD (FEV/FVC ratio < 70% and FEV 1 < 50%).
5. Heart failure (New York Heart classes 2-4).
6. Recent history (last 3 months) of a major cardiovascular event i.e. MI, unstable angina, CVA; or major disorder of the pulmonary, renal or nervous systems.
7. Chronic narcotic use.
8. Major depression i.e. hospitalisation for depression, suicide attempt or symptoms necessitating antidepressant drug dose escalation in the previous 3 months.
9. Pregnant or breast feeding.
10. Unacceptable anaesthetic or surgical risk (e.g. anticoagulant or antiplatelet medication which cannot be withdrawn).
11. Contraindication to intraoperative dexamethasone e.g. mania, brittle diabetes, avascular necrosis of hip
12. History of dysphagia or aspiration.
13. Currently working as a commercial driver.

### Surgical Eligibility

To be **eligible** for the trial, patients **must have**:

1. **Lack of significant obstructive nasal pathology by nasendoscopy**
2. **No significant palatal scarring from previous tonsil surgery**  
(surgeon feels scarring will compromise the ability to get a good outcome)
3. **No large obstructing lingual tonsils**
4. **Confirmed airway collapse on Mueller's Manoeuvre and/or Woodson's Hypotonic Method of airway assessment**
5. **No primary supraglottic collapse**
6. **No laryngeal or subglottic or tracheal stenosis**

## Screening Measurements

### Modified Friedman Staging System

This measurement is taken pre-operatively during patient screening at Visit 3.

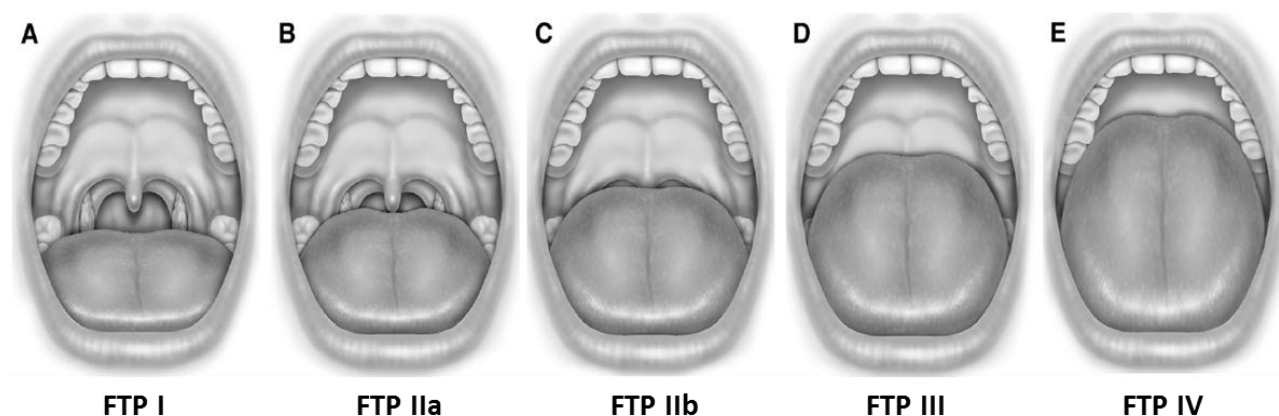

The Friedman Tongue Position is based on visualisation of structures in the mouth with the mouth open widely without protrusion of the tongue.

| FTP  | Anatomical structures visualized             |
|------|----------------------------------------------|
| I    | Tonsils and pillars<br>Entire uvula          |
| II a | Uvula                                        |
| II b | Most of the soft palate<br>Base of the uvula |
| III  | Some of soft palate                          |
| IV   | Only the hard palate                         |

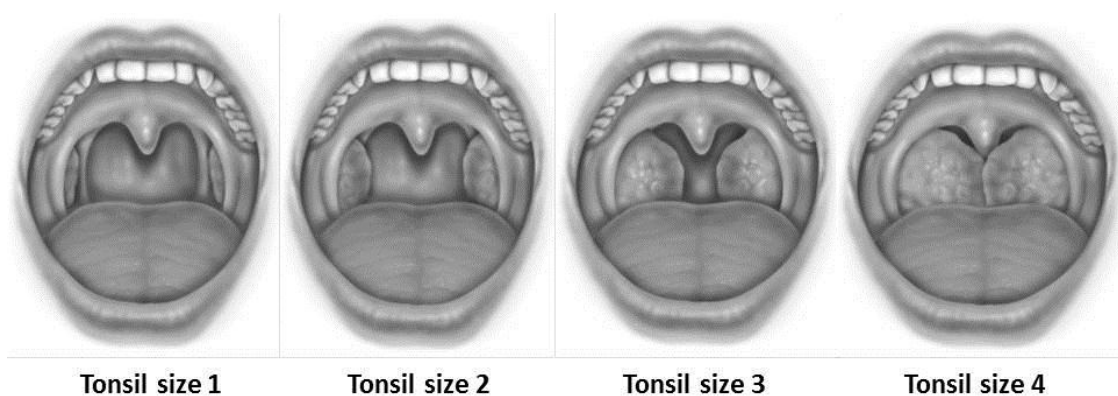

Tonsil size is graded from 0 to 4. Tonsil size 0 denotes surgically removed tonsils. Size 1 implies tonsils hidden within the pillars. Tonsil size 2 implies the tonsils extending to the pillars. Size 3 tonsils are beyond the pillars but not to the midline. Tonsil size 4 implies tonsils extend to the midline.

**Table 4**  
**Friedman staging system, based on anatomical findings**

| Stage | Friedman tongue position | Tonsil size | Body mass index       |
|-------|--------------------------|-------------|-----------------------|
| I     | I                        | 3, 4        | <40 kg/m <sup>2</sup> |
|       | IIa or IIb               | 3, 4        | <40 kg/m <sup>2</sup> |
| II    | I, IIa, IIb, III, or IV  | 1, 2        | <40 kg/m <sup>2</sup> |
|       |                          | 3, 4        | <40 kg/m <sup>2</sup> |
| III   | III                      | 0, 1, 2     | <40 kg/m <sup>2</sup> |
|       | IV                       | 0, 1, 2     | <40 kg/m <sup>2</sup> |
| IV    | Any                      | Any         | >40 kg/m <sup>2</sup> |

Reference: Friedman, M., Soans, R., Gurpinar, B., Lin, H.C., Joseph, N.J. Interexaminer agreement of Friedman tongue positions for staging of obstructive sleep apnea/hypopnea syndrome. *Otolaryngol Head Neck Surg.* 2008, 139(3):372-377.

## Functional Nasal Assessment

This measurement is taken at Baseline pre-operatively at Visit 3.

Refer to **Video 1** for comprehensive demonstration/methodology

- Nasal Misting Airflow (Left and Right Nostril)
- Thudichum Speculum (Left and Right Nostril)
- Dynamic Nasal Valve Collapse
- Tip of Nose

## Fibreopticpharyngoscopy (Nasendoscopy) Manoeuvres

This measurement is taken at Baseline pre-operatively at Visit 3 and again at six months post-operatively at Visit S6.

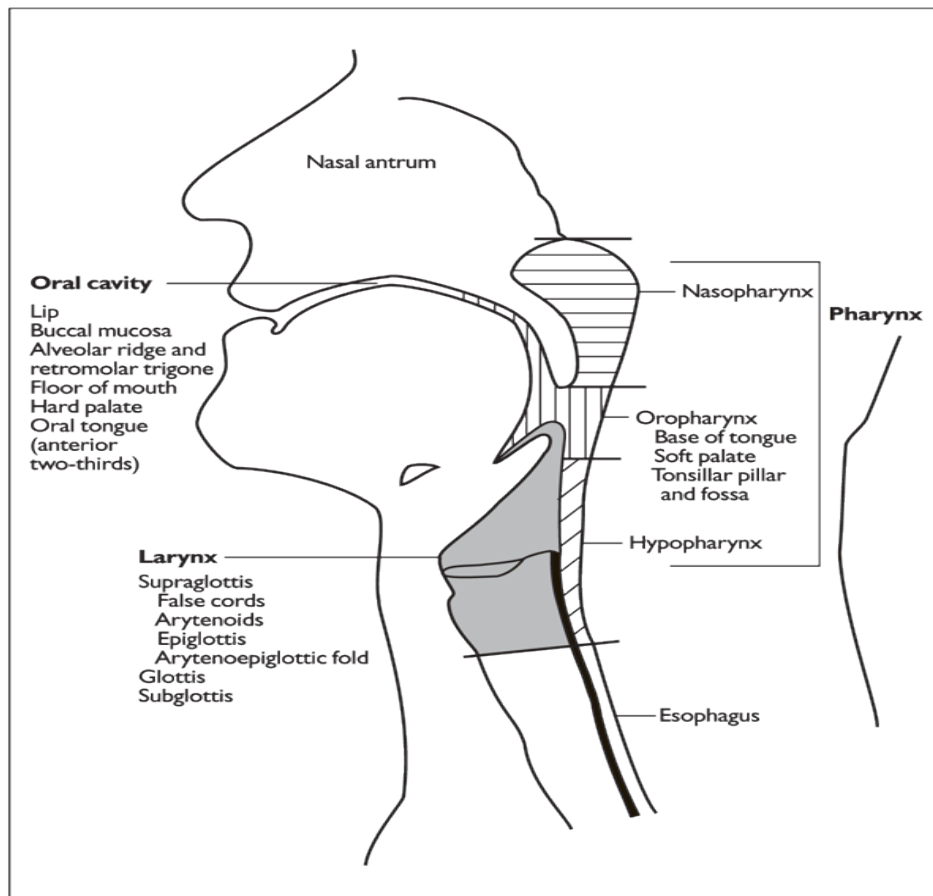

Refer to **Videos 2 & 3** for comprehensive demonstration/methodology

- Structural Assessment
- Modified Mueller's Manoeuvre (MMM)
- Woodson's Hypotonic Method (WHM)
- Erect and Supine Positions
- Retropalatal/Retrolingual levels
- Assess tonsillar generated collapse

- Collapse graded as:
  - **None (0-25%)**
  - **Moderate (25-75%)**
  - **Significant (75-100%)**

See **Video 3** for an example of 0-25%

**Retropalatal Photos (copyright Dr. SG MacKay 2011)**

**Erect**

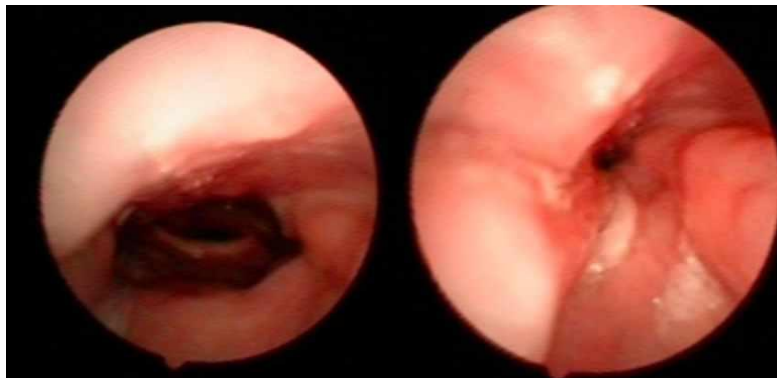

**Supine**

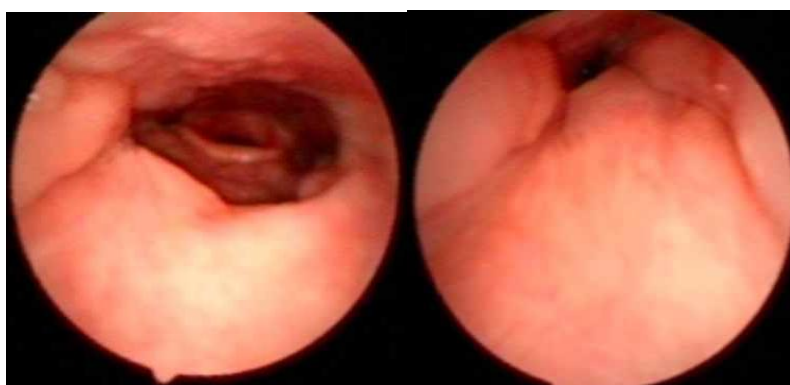

**Retrolingual Photos (copyright Dr. SG MacKay 2011)**

**Erect**

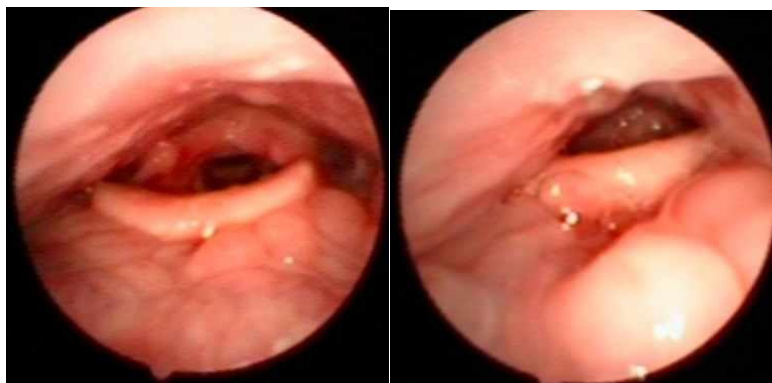

**Supine**

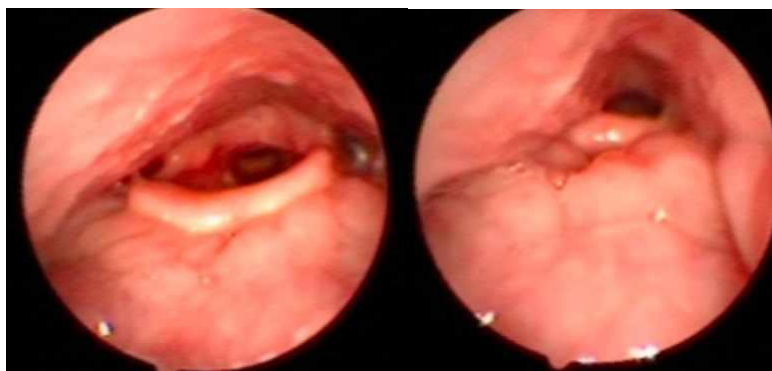



## Surgical Procedures

### Anaesthesia

As per Australian and New Zealand Collage of Anaesthetists standards.

**Intraoperative dexamethasone** and **intraoperative cephalosporin**, or other broad spectrum antibiotic if patient allergic.

### Bilateral Tonsillectomy and Modified UPPP

#### Additional References

- MacKay *et al.* Modified uvulopalatopharyngoplasty and coblation channeling of the tongue for obstructive sleep apnea: a multi-centre Australian trial. *J Clin Sleep Med.* 2013. **9(2):117-24.**
- MacKay, S.G. and Crawford, J. Sleep Surgery Cadaver Dissection Manual. 2013

Refer to **Video 4** for demonstration/ methodology.

#### Tips:

- **DON'T** remove tissue apart from tonsils, supratonsillar fat, partial uvula (i.e. no mucosal resection) *RECONSTRUCTIVE NOT ABLATIVE*
- **DO** leave the palate *where you want it to be*
- **DO** use nasotracheal tube as a guide
- **DO** vary the extent of division of the posterior pillar musculature
- **DO** ensure good muscle to muscle suturing
- **DO NOT** get overly concerned with mucosal closure or lower pillar closure
- **DO** vary the extent of division of the posterior pillar musculature



### Diagram of Robinson-type Modified Uvulopalatopharyngoplasty

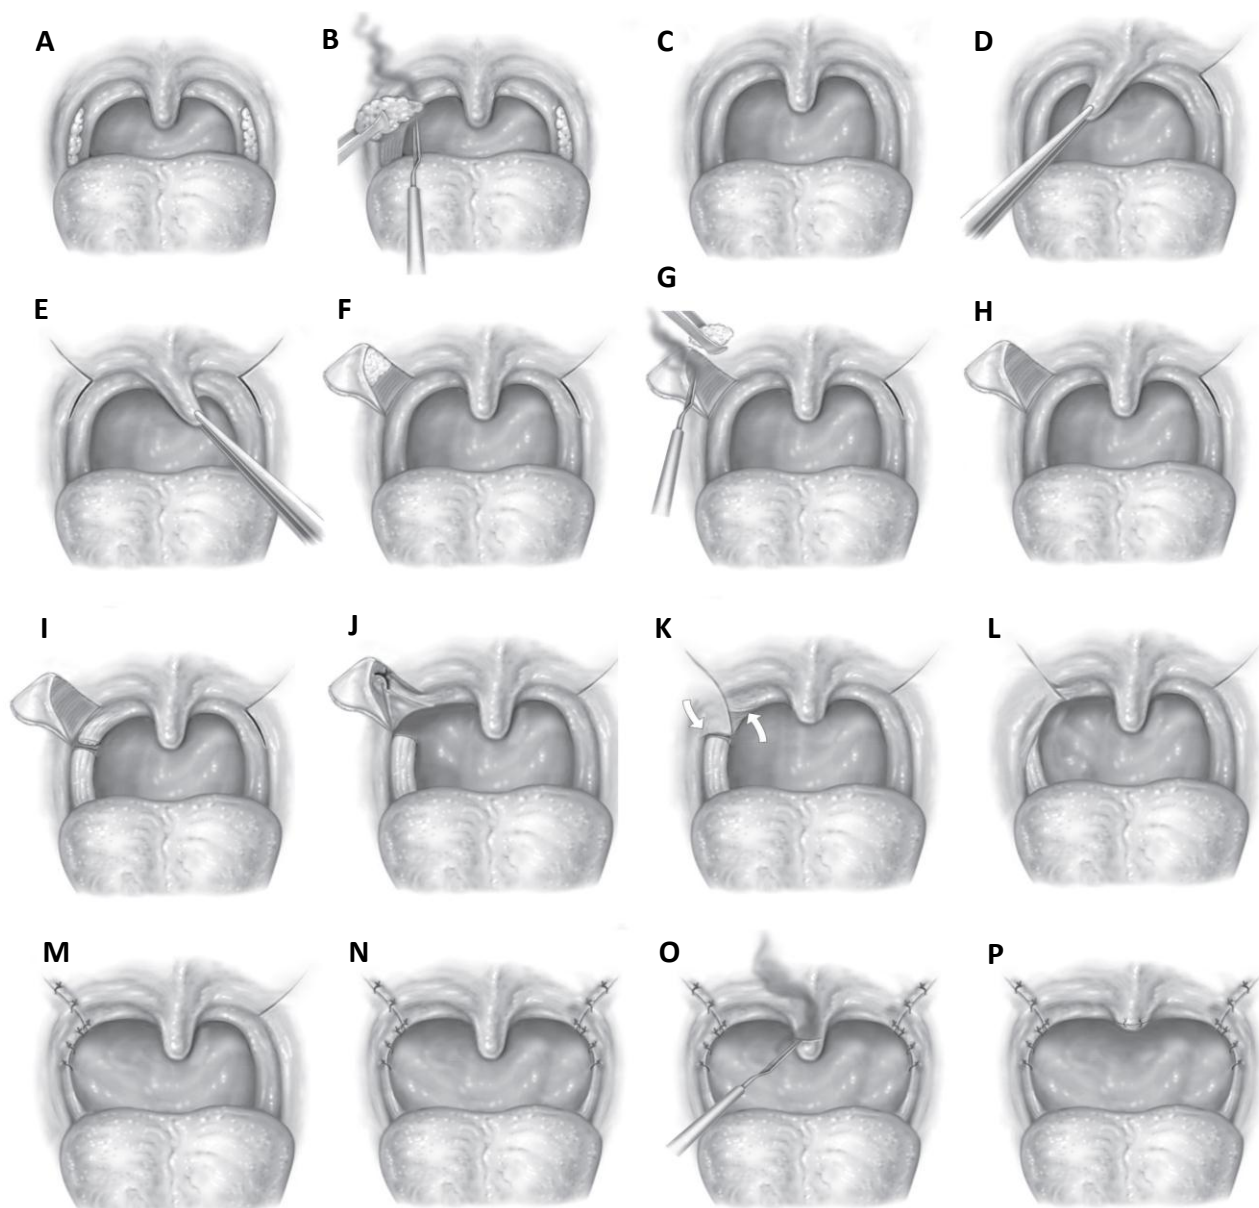

Image source: MacKay SG; Carney AS; Woods C; Antic N; McEvoy RD; Chia M; Sands T; Jones A; Hobson J; Robinson S. Modified uvulopalatopharyngoplasty and coblation channeling of the tongue for obstructive sleep apnea: a multi-centre Australian trial. *J Clin Sleep Med* 2013;9(2):117-124.

All of the following images sourced from the Sleep Surgery Cadaver Dissection Manual (MacKay and Crawford 2013)

## BILATERAL TONSILLECTOMY & MODIFIED UPPP

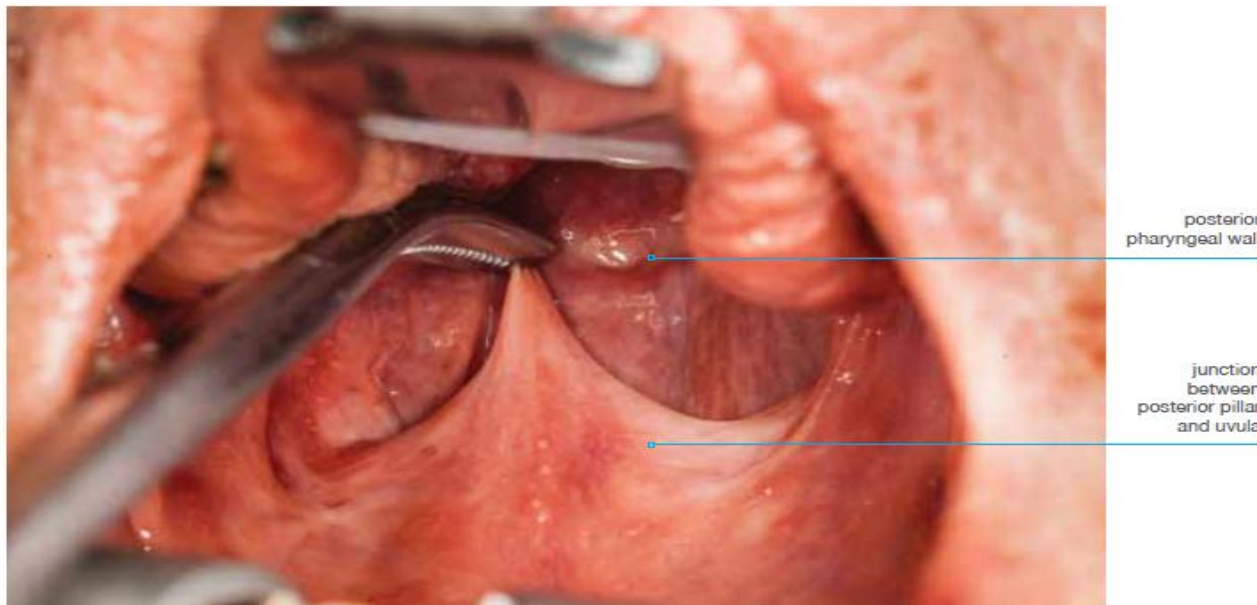

Caudal traction on the uvula towards the contralateral (left) foot

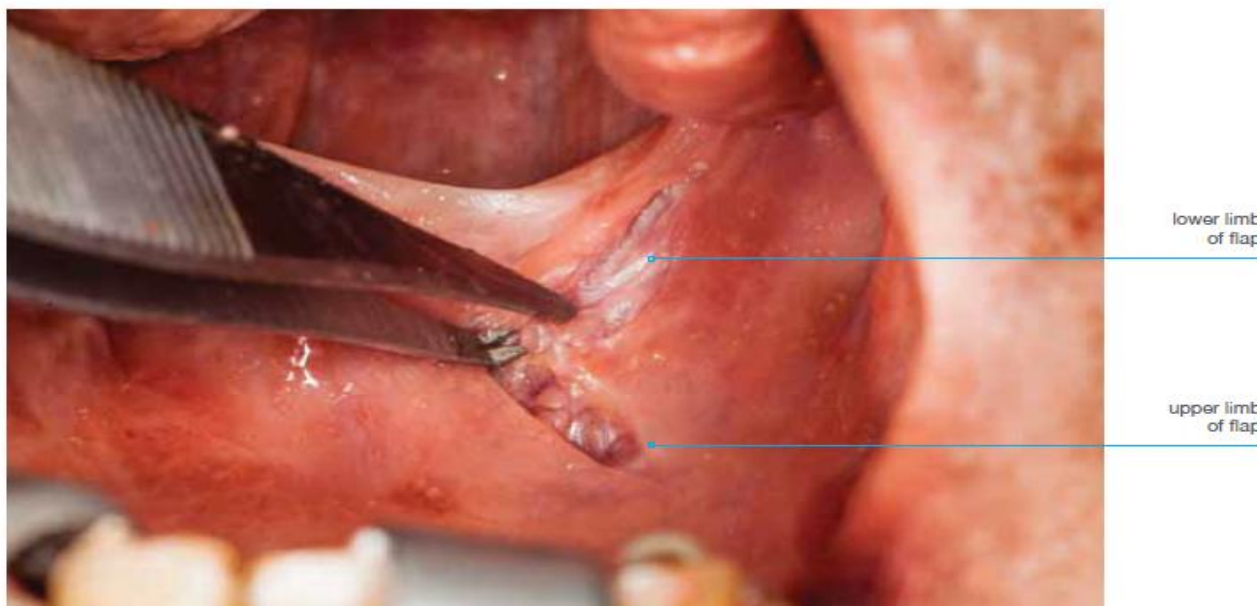

Whilst maintaining the caudal traction a triangular flap of mucosa is elevated

The upper limb of the triangle angles towards the maxillary tuberosity

The lower limb follows the line of the anterior pillar



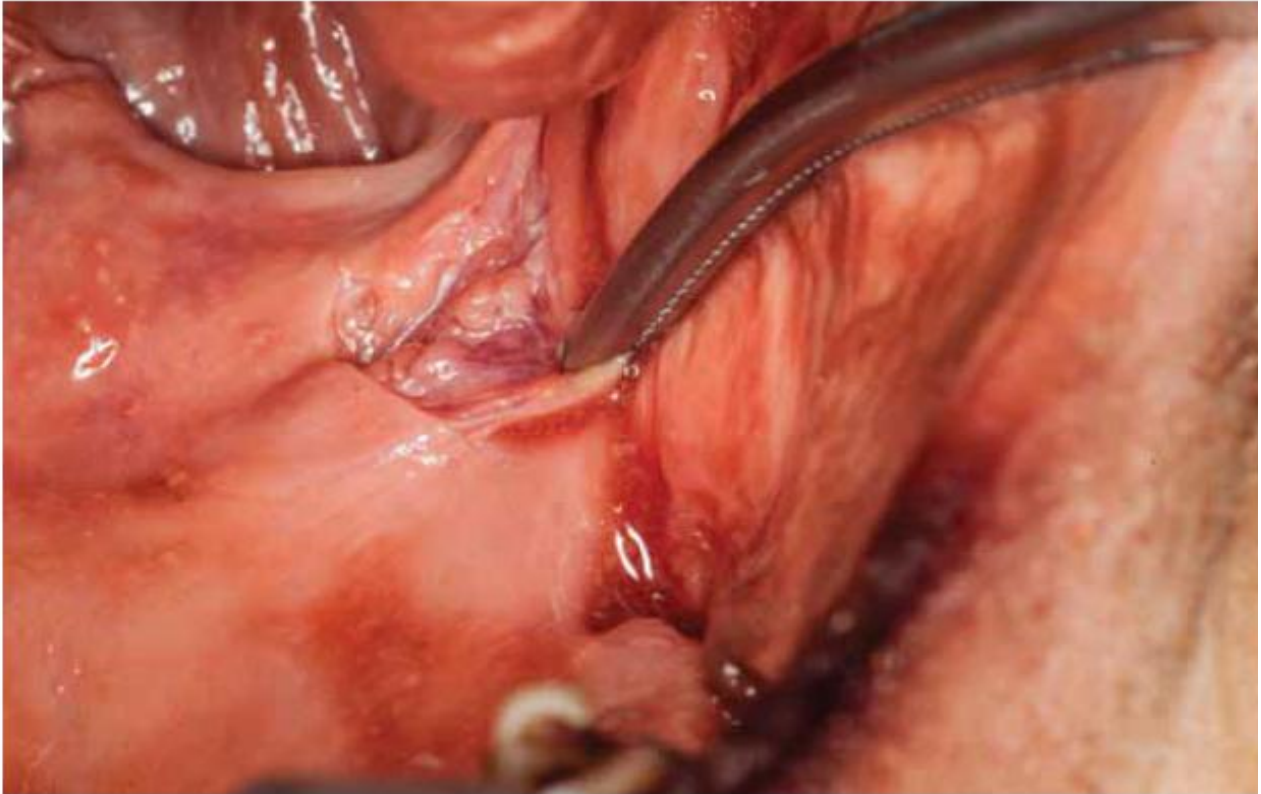

The triangular flap of mucosa is elevated to display the supratonsillar fat

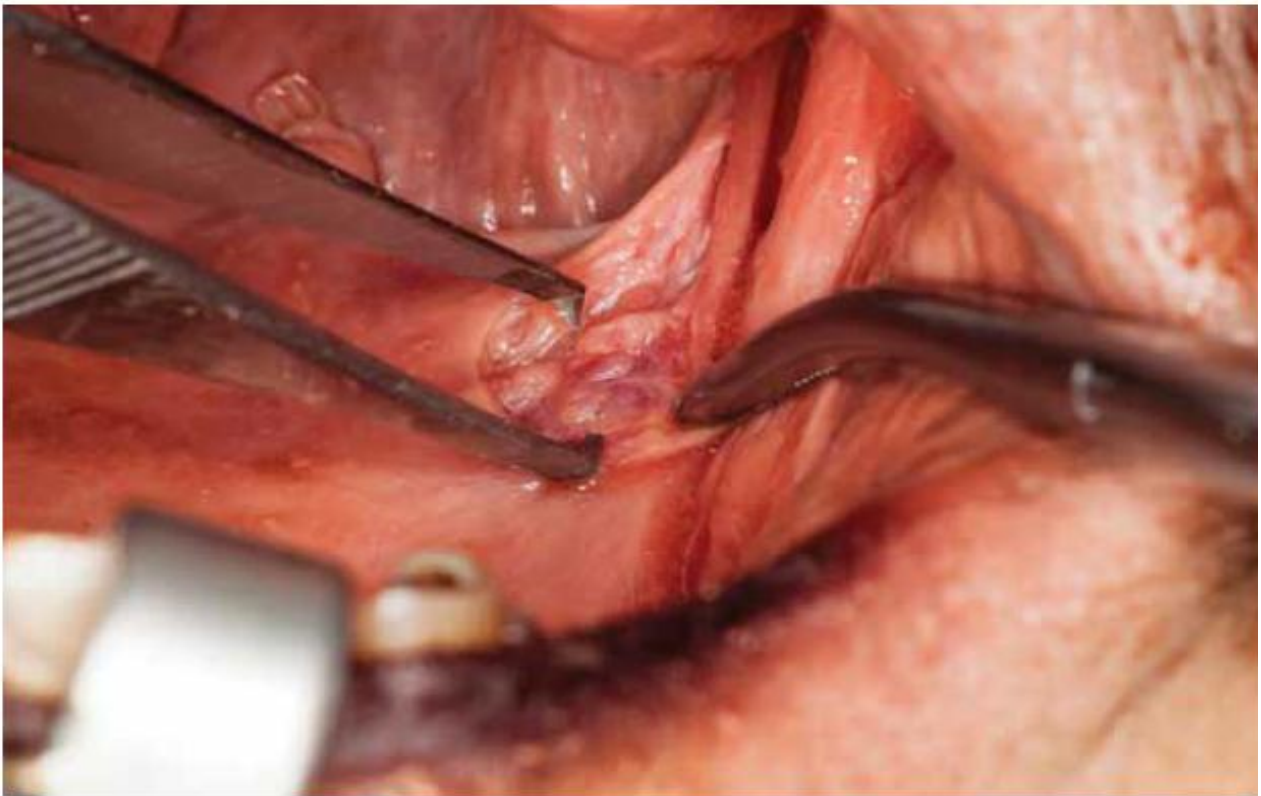

The supratonsillar fat is grasped with toothed forceps

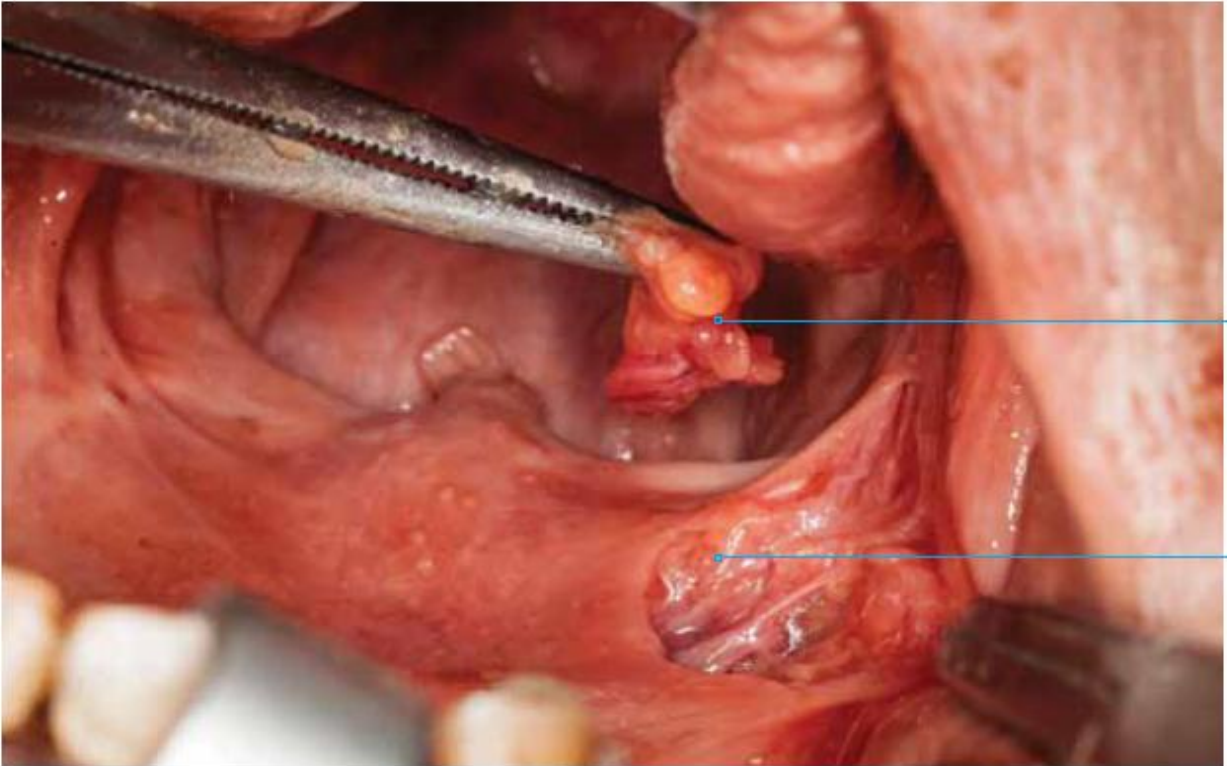

The supratonsillar fat is removed from the underlying arching muscular fibres

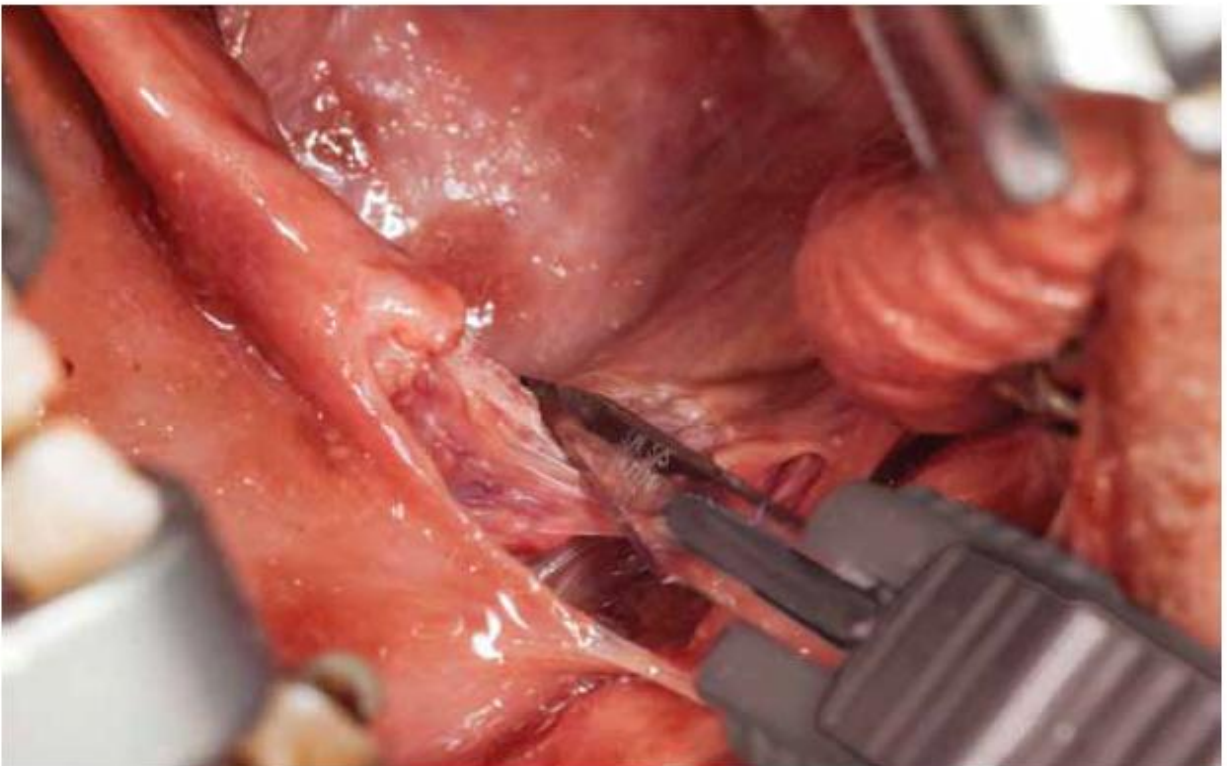

The posterior pillar mucosa and muscle is divided at the junction of the upper third and lower two thirds



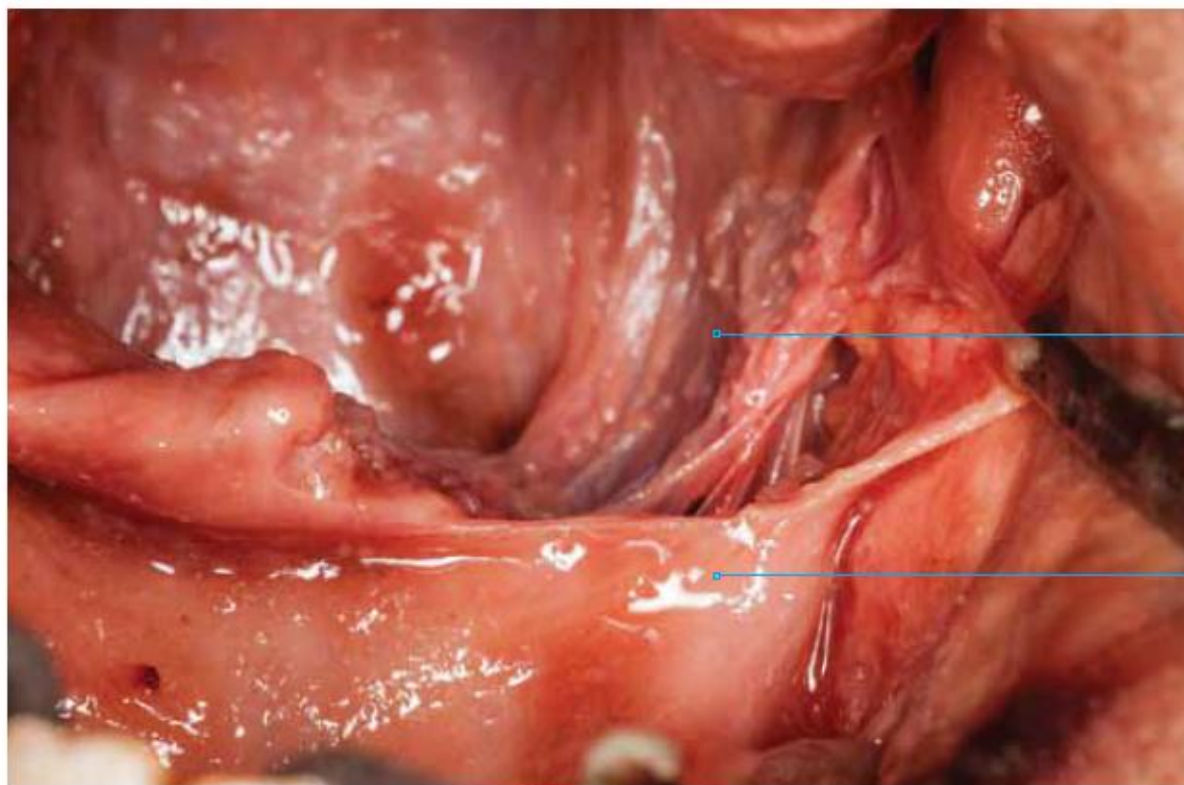

posterior pillar  
muscle fibres

soft palate

The completed division of the posterior tonsillar pillar is shown

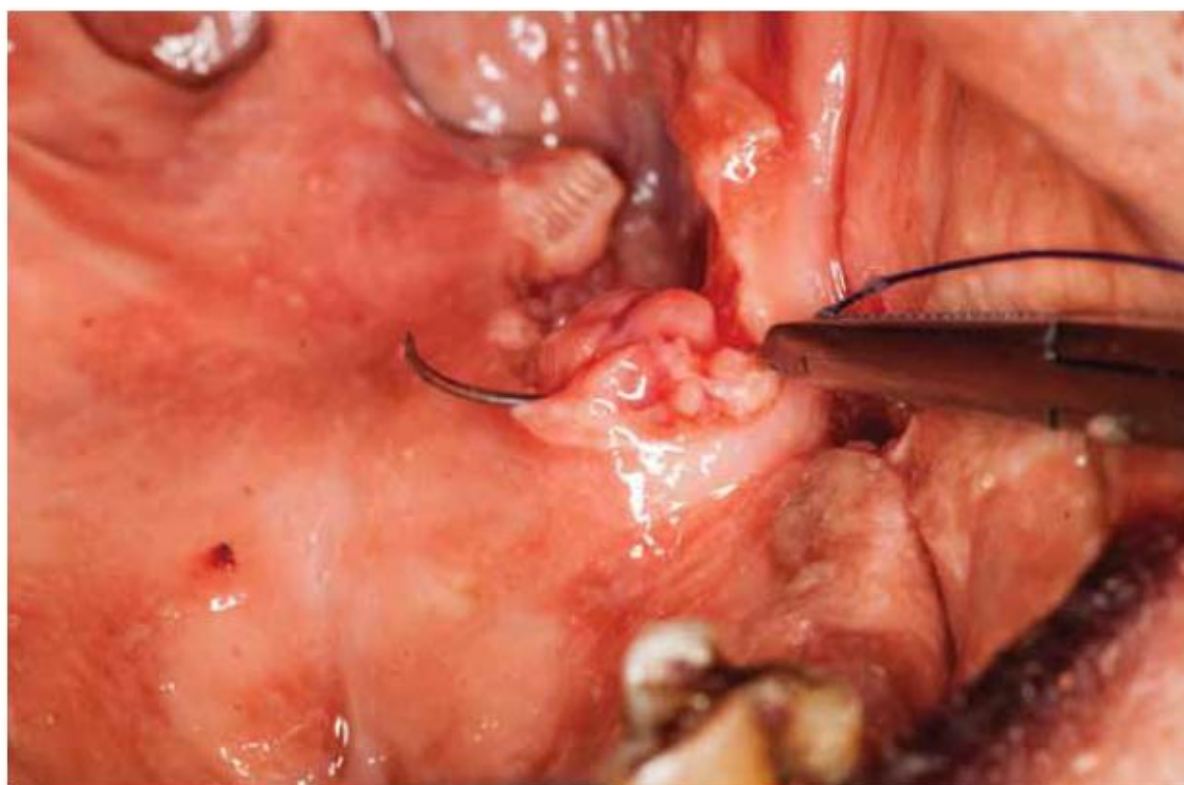

A 3-0 vicryl suture is passed with a large bite through the upper arching muscle fibres

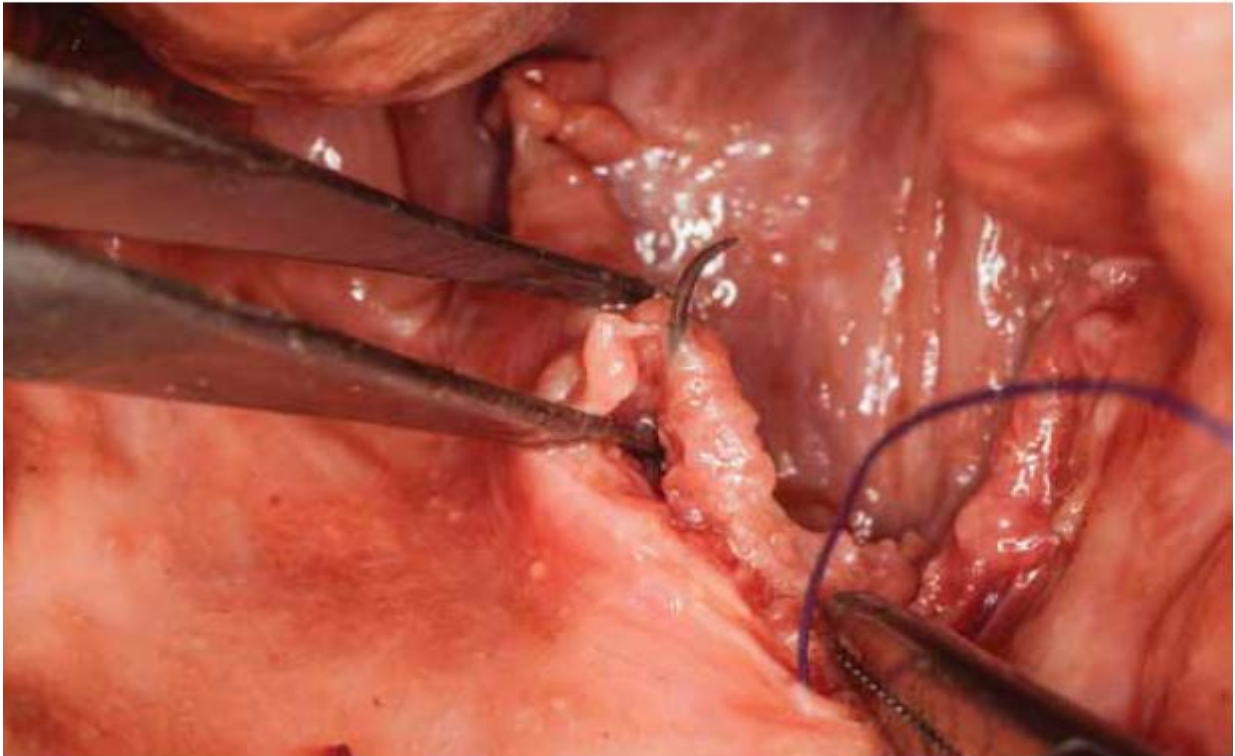

The suture is then passed through the muscle of the upper third of the divided posterior pillar tissue

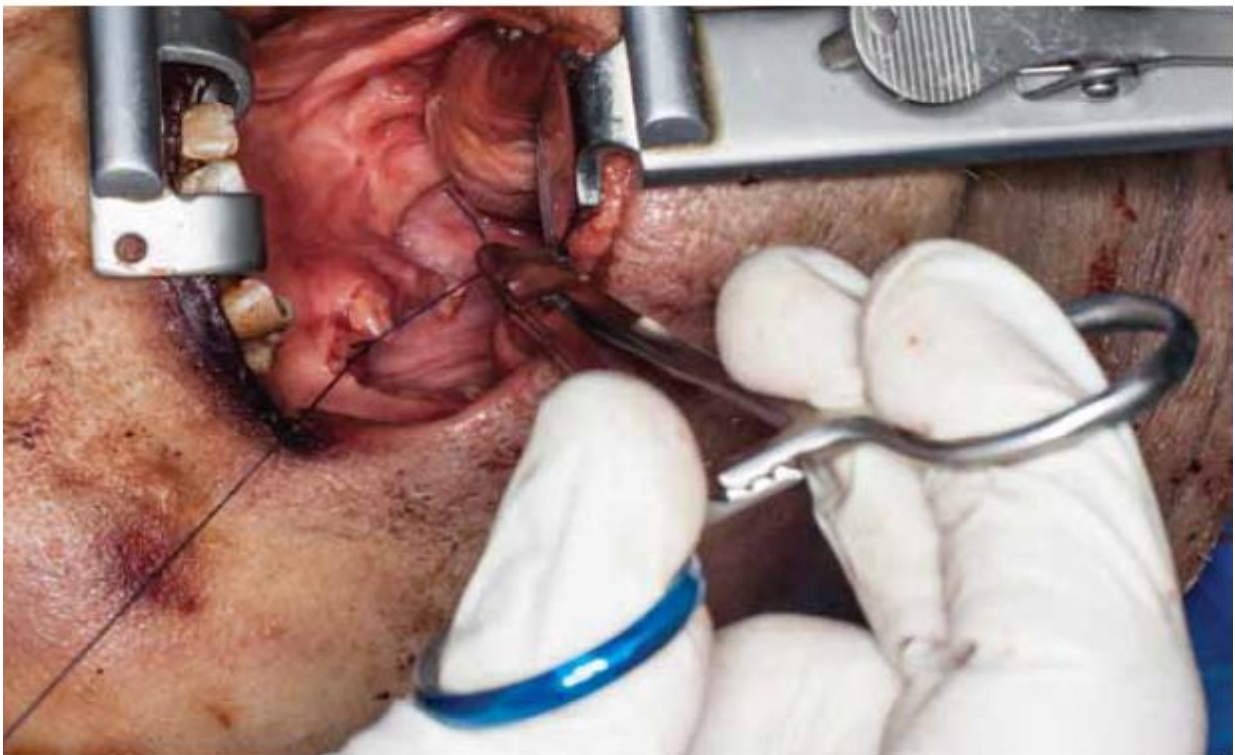

The needle holder is grasped in the orientation shown in order to secure the knot of the suture



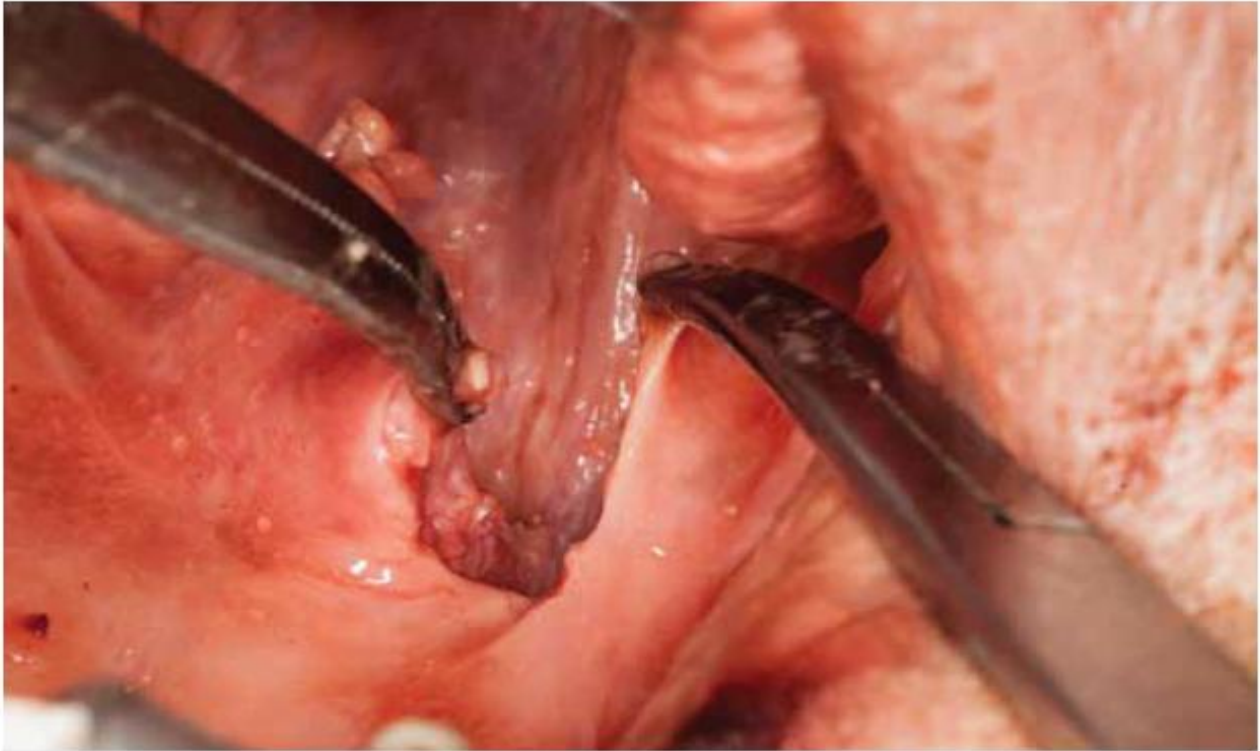

After muscle apposition is achieved the mucosal flaps are closed to reduce post operative pain

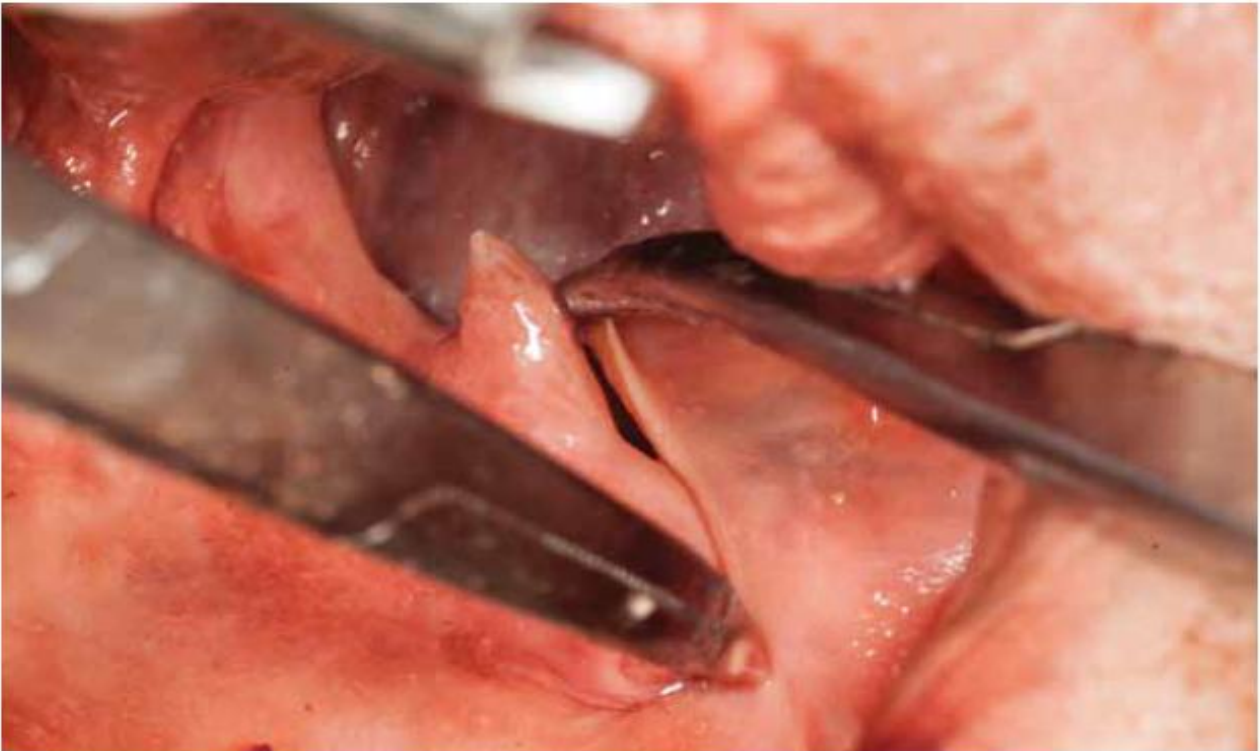

The mucosa may be closed in a pseudo z-plasty configuration



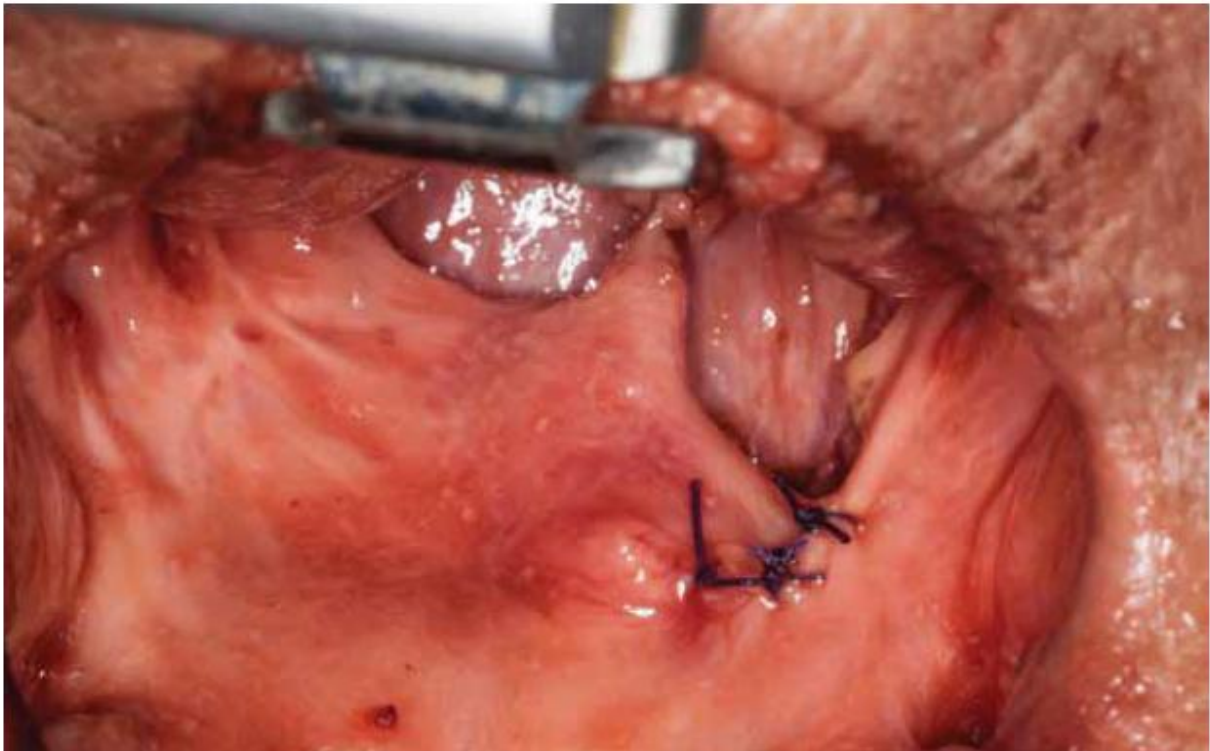

The right hemi-operation is complete

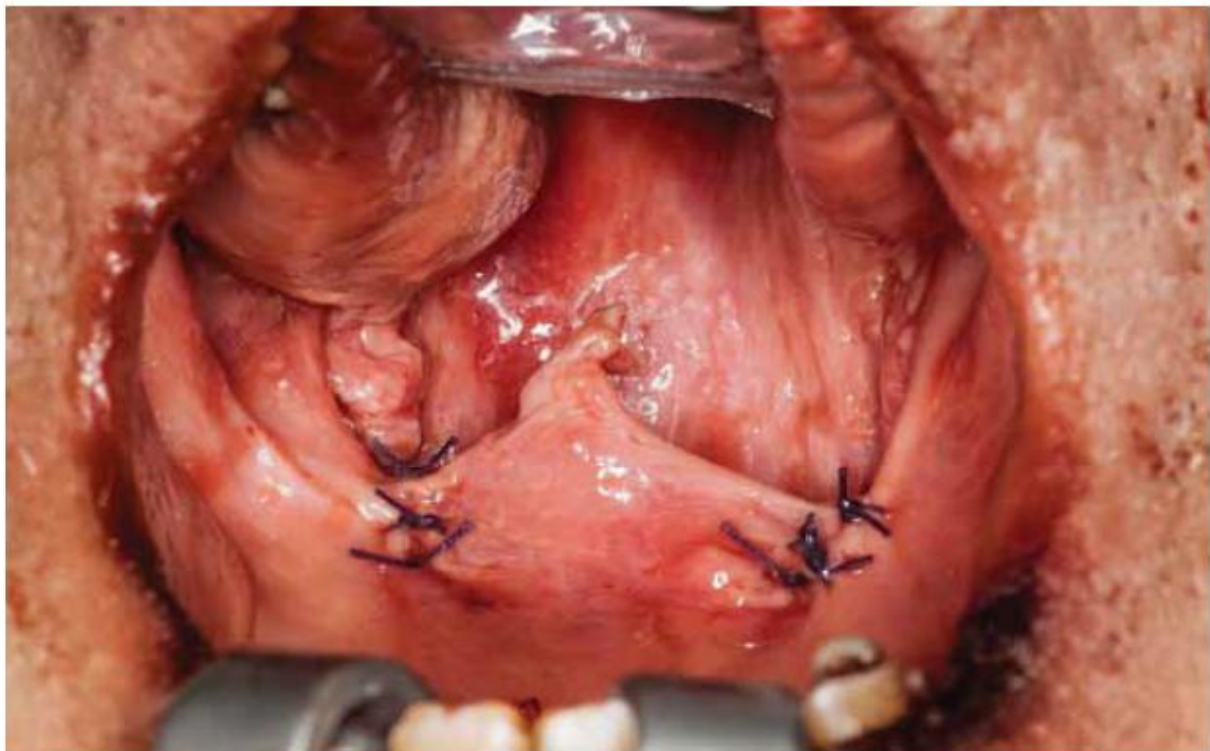

The same steps are repeated on the left

Superolateral velopharyngeal port openings, as well as increased anterior posterior dimension are achieved

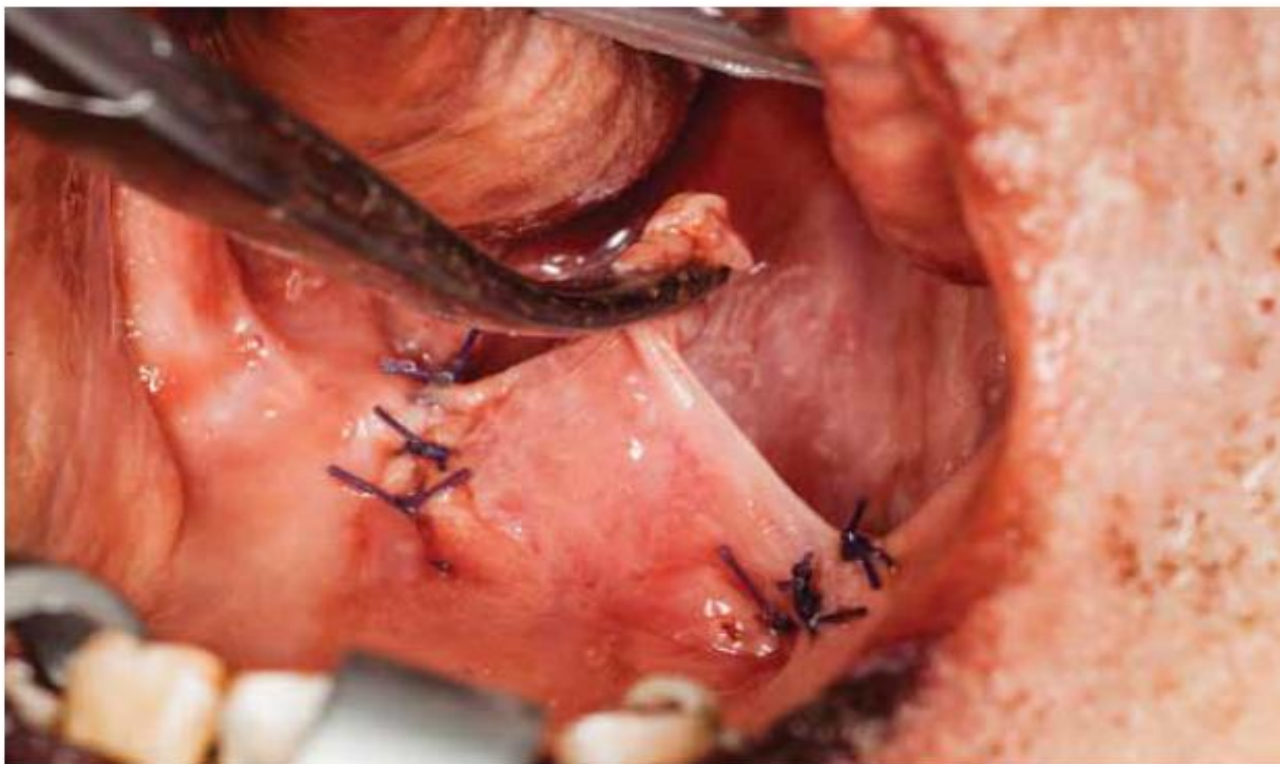

A small neo-uvula is fashioned in a beveled plane, leaving a slightly greater amount of the posterior uvula mucosa.

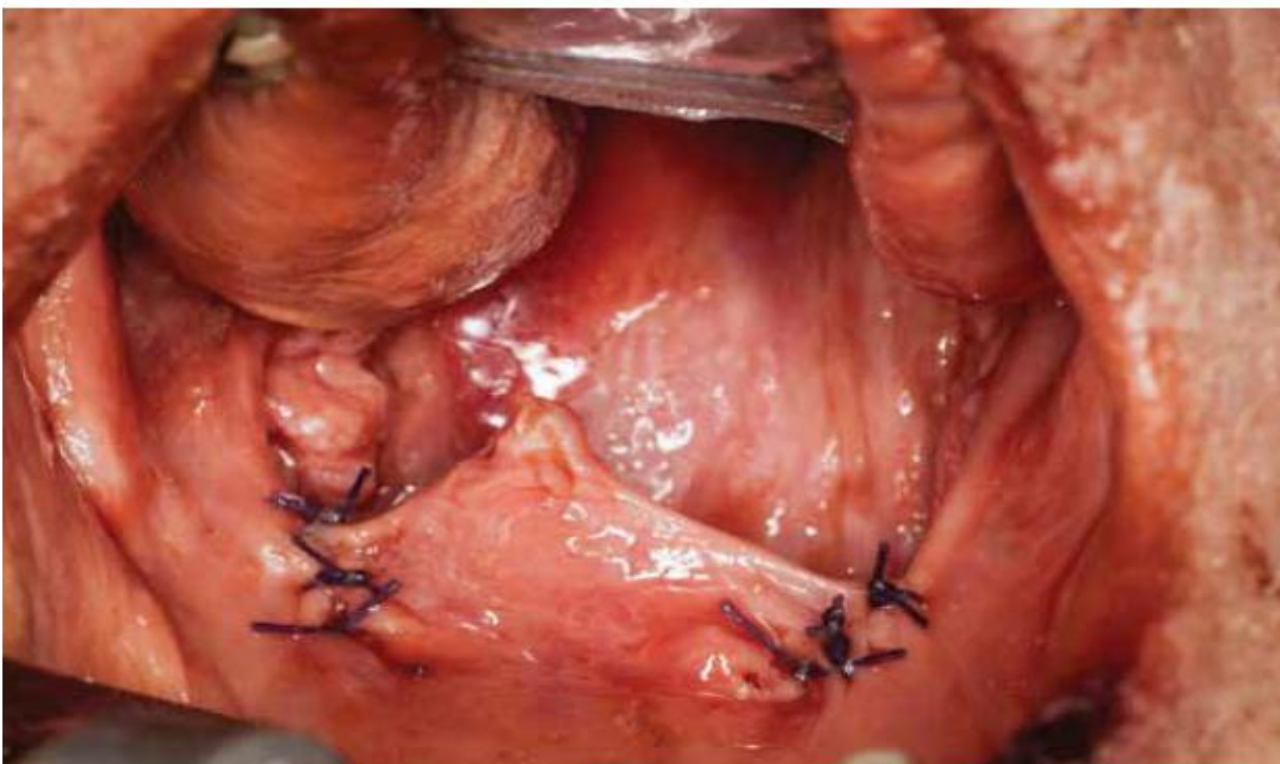

The completed operative view is shown



## Coblation Channelling of the Tongue (CCT)

|                                                                                                                                                         |                                                                                                                                                                                                                                                                      |
|---------------------------------------------------------------------------------------------------------------------------------------------------------|----------------------------------------------------------------------------------------------------------------------------------------------------------------------------------------------------------------------------------------------------------------------|
| <b>ReFlex XP wand, Power 6</b><br><b>15 seconds per channel with chilled saline</b>                                                                     |                                                                                                                                                                                                                                                                      |
| <b>Standard protocol:</b>                                                                                                                               | <b>Total number of channels: 7</b><br>Midline coblation channels: <b>3 standard</b><br>Lateral channels: <b>4 (2 left, 2 right)</b>                                                                                                                                  |
| <b>Optional channels:</b>                                                                                                                               | <b>Total number of channels: 9</b><br>Midline coblation channels: <b>Up to 5, if no para-midline channels performed</b><br>Lateral channels: <b>4 (2 left, 2 right)</b><br>Para-midline (optional): <b>2 (1 left, 1 right), if only 3 midline channels performed</b> |
| Lesions at <b>1 cm</b> intervals<br>Posterior limit: <b>1 cm</b> anterior to circumvallate papillae<br>Anterior limit: <b>2.5 cm</b> from tip of tongue |                                                                                                                                                                                                                                                                      |

All of the following images sourced from the Sleep Surgery Cadaver Dissection Manual (MacKay and Crawford 2013)

## COBLATION CHANNELING OF TONGUE

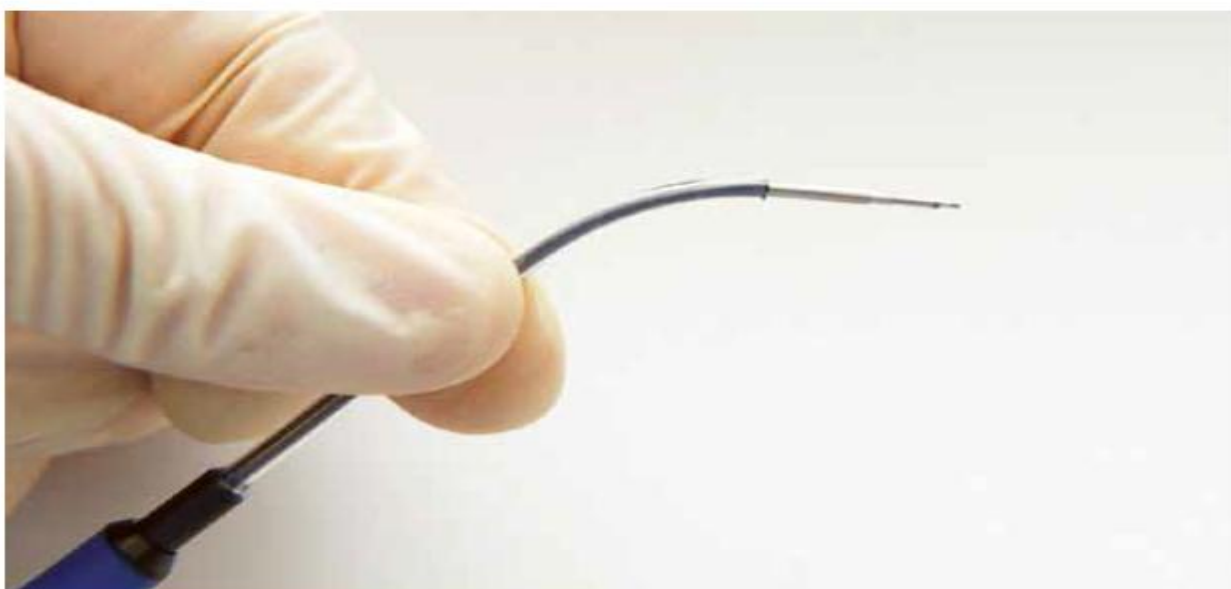

Radiofrequency systems can be utilised to perform low morbidity reduction of macroglossia.

In this instance we are utilising a ReFlex Ultra® SP coblation wand which has a distal ablative electrode and a proximal thermal electrode. This provides the dual therapy that results in both immediate and sustained tissue reduction.

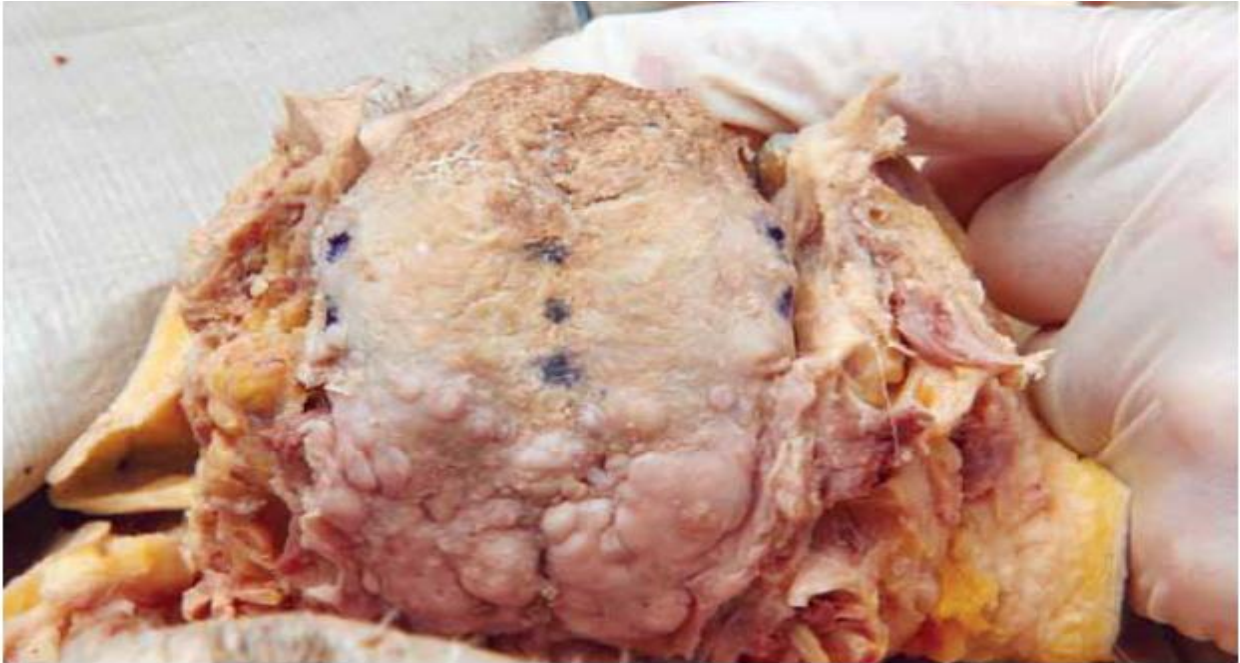

The probe can be passed into seven or nine anatomically safe channels preserving the integrity of the major neurovascular bundles

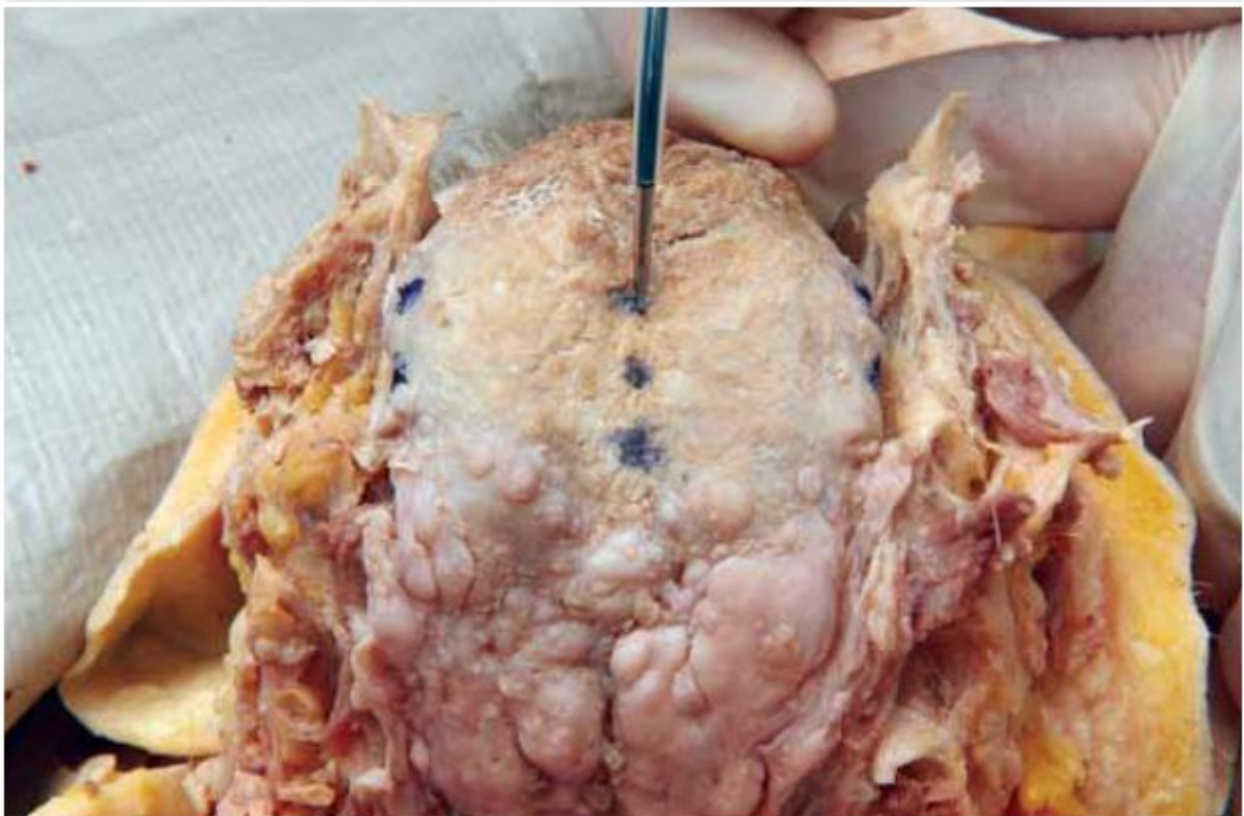

The first three channels should be in the midline, directing the probe posteriorly on an angle



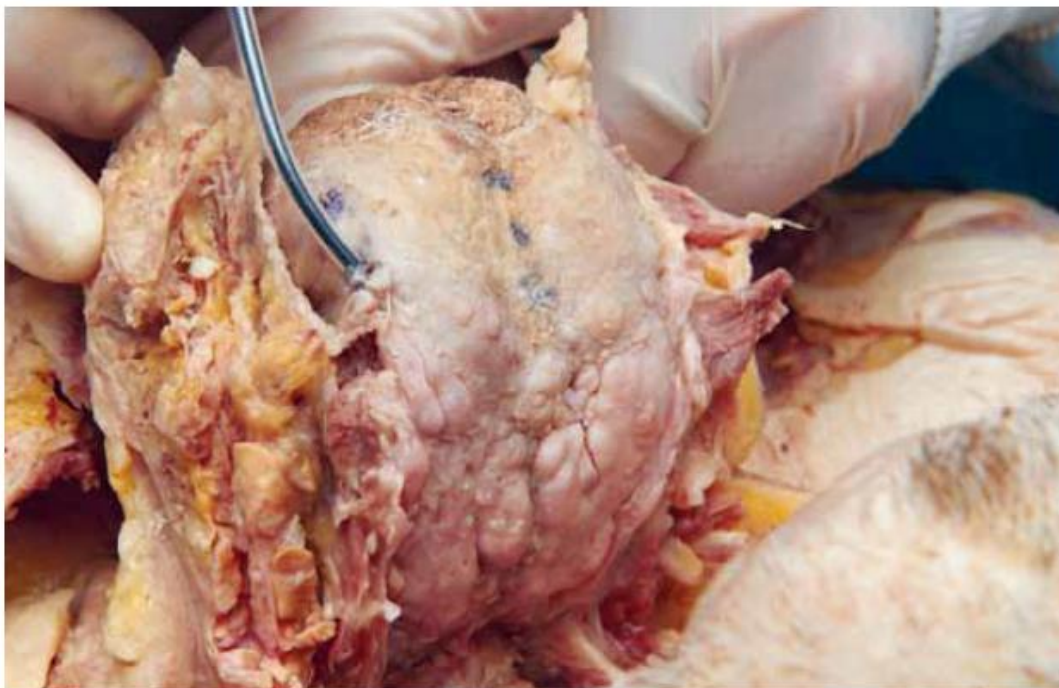

Two lateral channels on each side are performed introducing the probe at the junction of the dorsal and lateral tongue mucosa

The probe is orientated towards the circumvallate papillae without angulation cranially or caudally

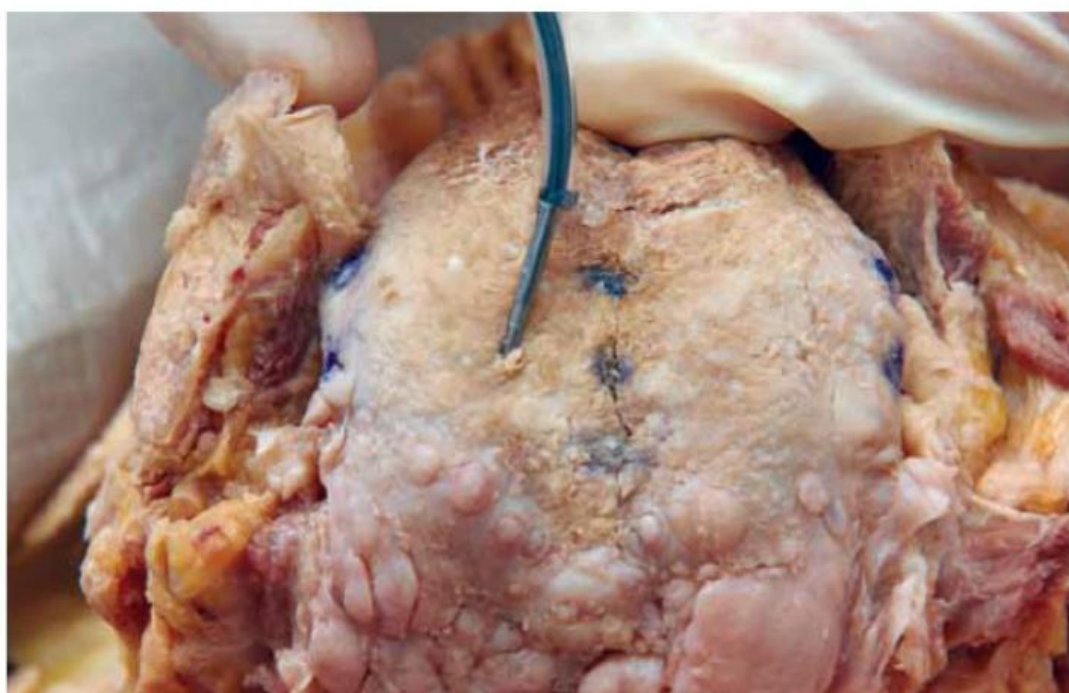

Two additional channels may be carried out by passing the probe midway between the midline and lateral tongue orientating the probe towards the postero-lateral tongue

Ensure delivery is performed superficially so as to preserve the integrity of the neurovascular bundle

## Perioperative Care Protocols

### Pre-Operative

#### Medications

All blood thinning medications are to cease **2 – 10 days (as relevant) prior to surgery** and **10 days post-operatively**. These include (but are not restricted to) the following:

| General                           | Aspirins                 | Anticoagulants              | Anti-inflammatories |
|-----------------------------------|--------------------------|-----------------------------|---------------------|
| Echinacea                         | Aspirin                  | Asasantin                   | Brufen              |
| Fish oils                         | Action cold and flu tabs | Brilinta (Ticagrelor)       | Feldene             |
| Flaxseed oil                      | Alka-seltzer             | Clexane                     | Indocid             |
| Garlic tablets                    | Aspalgin                 | Dindevan                    | Mobic (Meloxicam)   |
| St John's Wort                    | Aspro/Aspro Clear        | Heparin                     | Naprosyn            |
| Gingko biloba                     | Astrix Bayer Aspirin     | Eliquis (Apixaban)          | Niapren             |
| Tebonin                           | Bex powders/tabs         | K-thrombin                  | Nurofen/Ibuprofen   |
| Chamomile                         | Bufferin                 | Phenindione                 | Orudis              |
| Vitamin C                         | Cardiprin                | Plavix (Clopidogrel)        | Surgam              |
| <b>ALL HERBAL<br/>SUPPLEMENTS</b> | Cartia                   | Pradaxa (Dabigatran)        | Tilcotil            |
|                                   | Codiphen                 | Warfarin (Coumadin Marevan) | Voltaren            |
|                                   | Codis                    | Xarelto (Rivaroxaban)       |                     |
|                                   | Codox                    |                             |                     |
|                                   | Codral Forte             |                             |                     |
|                                   | Decrin powders           |                             |                     |
|                                   | Disprin                  |                             |                     |
|                                   | Ecotrin                  |                             |                     |
|                                   | Morphalgin               |                             |                     |
|                                   | Pedodan                  |                             |                     |
|                                   | Solcode                  |                             |                     |
|                                   | Solprin                  |                             |                     |
|                                   | Sra                      |                             |                     |
|                                   | Veganin                  |                             |                     |
|                                   | Vincent powders/tabs     |                             |                     |
| Winsprin                          |                          |                             |                     |

### Post-Operative

- Assess tongue, ice to suck in recovery concurrent RFTA/CCT
- Intraoperative antibiotics, steroid
- ICU/ HDU monitoring
- Encourage post-op intake of fluids, soft foods
- Reduce incidence of gagging by sleeping upright at a 45° angle for 10-14 days post-op

## Medications

All patients initially offered *Standardised Tiered Analgesia*:

- Cephalexin x 500mg 4 daily 7-day course or alternative broad spectrum antibiotic
- 2 Panadol or 2 Panadeine Forte (or one of each) on every administration of antibiotic
- Post-operative telephone call regarding pain management/wound site
- Addition of 25 or 50 mg Prednisone as option for post-operative oedema or:
  - i. On presence of persistent break-through pain
  - ii. On presence of break-through pain
- Anti-reflux medications as indicated
- In the event of codeine instigated constipation, coloxyl and senna or lactulose

Additional Analgesia to the above for persistent break-through pain at surgeon's discretion:-

- Endone (5 - 10 mg 4 hourly PRN)
- Celebrex 100 – 200 mg BD PRN
- Tramadol 50 - 100 mg 48hrs PRN
- Endep 10 mg at night for up to 10 days

**\* Caution: Use strong opioids with care with patients with significant obstructive sleep apnoea \***

## Post-operative expectations

Presence of *Globus* in first month through to 3 months post-op is an expected manifestation of procedure. **Persistent *Globus* at 3 months and beyond is an adverse event.**

Other normal post-op occurrences include:

- i) swollen uvula (or tongue because of the retractor)
- ii) spitting out, swallowing stitches
- iii) oedema
- iv) minor bleeding at wound site
- v) wound break-down
- vi) halitosis
- vii) whitish/greyish scab over suture line



## Adverse Events

All adverse events occurring from the time the patient signs the consent form up to completion of the study, serious or not, should be recorded in the Adverse Event Form within 48 hours of study personnel becoming aware of the event. If the adverse event can be categorised as a Serious Adverse Event, a Serious Adverse Event Form must also be completed.

### Post-op

Airway swelling - requiring medical or surgical intervention (other than steroids)

Bleeding – Stammberger grades B - E

Dehydration – requiring hospitalisation

Excessive pain – requires additional analgesia above protocol for persistent break-through pain.

### Transient at 1 Month to 3 months

Velopharyngeal inadequacy (VPI) speech

VPI swallowing/ regurgitation

VPI hypernasality

### Persistent at 3 Months and beyond 6 months

*Globus pharyngeus*

Taste loss

Tongue numbness

Tongue weakness

VPI speech

VPI swallowing/ regurgitation

VPI hypernasality

*An increase of **3 points** on the 0 - 10 scale from the Baseline scores (day of operation) is considered an adverse event and requires an Adverse Event Form to be completed.*

*If tongue function and taste responses at 3 month follow-up and beyond are **different from Baseline responses (worsening)**, this is considered an adverse event. Surgeon to investigate further and complete an Adverse Event Form.*

## Bleeding Grades

Post-operative bleeding is measured using the grading system defined by Sarny *et al.*, Laryngoscope 2011.

### Severity of Bleeding Episode

- A Anamnestically recorded blood-tinged sputum
  - A1 Wound is and stays dry, no coagulum upon inspection
  - A2 Coagulum upon inspection, dry wound after removal
- B Bleeding actively under examination, treatment necessary, dry wound afterwards, blood count in normal range, no shock
  - B1 Minimal haemorrhage, stops after non-invasive treatment (e.g. adrenalin sponge)
  - B2 Haemorrhage requiring treatment in local anaesthesia
- C Surgical treatment in general anaesthesia, blood count still in normal range, no shock
- D Dramatic haemorrhage, haemoglobin decreased, blood transfusion required, difficult surgical treatment, intensive care may be necessary
- E Exitus due to haemorrhage or haemorrhage-related complications

Sarny, S., Ossimitz, G., Habermann, W. and Stammberger, H. *Hemorrhage Following Tonsil Surgery: A Multicenter Prospective Study*. Laryngoscope, 2011. **121**(12): pp. 2553 - 2560.

***Post-operative bleeding of grades B, C, D and E are considered to be adverse events and require an Adverse Event Form to be completed.***

## Serious Adverse Events

The mechanisms for reporting Serious Adverse Events are based on the guidelines adopted by the International Conference on Harmonisation Good Clinical Practice (ICH GCP). The definition of a SAE is any untoward medical occurrence that:

- Results in death
- Is life threatening (i.e. the patient was at risk of death at the time of the event; it does not refer to an event that might hypothetically have caused death had it been more severe)
- Requires in-patient hospitalisation or prolongation of existing hospitalisation
- Results in persistent or significant disability or incapacity
- Is a congenital anomaly or birth defect

### Recording and Reporting Adverse Events

The minimum information required to be documented is diagnosis/adverse event term, details of any procedures performed, the date of onset and resolution and the investigator's opinion regarding the causal relationship of the event in relation to the study.

All Serious Adverse Events must be reported to the Southern Adelaide Clinical Research Ethics Committee. A Serious Adverse Event Report (template from SAC HREC) must be completed and submitted to the committee within 48 hours of study personnel becoming aware of the event, CC'd to the Wollongong, Sydney and RAH governances, if affecting that site. The committee must also be informed if the investigator believes that the SAE has implications for other study patients.

The study research assistants have all of the paperwork essential for reporting adverse events and serious adverse events. ***In the event of an AE or SAE, please contact your corresponding RA or trial project manager within 24 hours*** so the paperwork may be completed and sent to the relevant committees within 48 hours.

#### Adelaide Research Assistant

Kelsey Altmann  
8222 4321 (RAH); 8364 4434 (Kent Town)  
8222 2990 (f)  
[Kelsey.altmann@health.sa.gov.au](mailto:Kelsey.altmann@health.sa.gov.au)

#### Flinders Research Assistant (trial project manager)

Alison Pinczel  
8275 1022 (ph)  
8277 6890 (f)  
[Alison.pinczel@health.sa.gov.au](mailto:Alison.pinczel@health.sa.gov.au)

#### Wollongong Research Assistant

Natasha Umrigar  
0424 092 550 (ph)  
4227 6292 (f)  
[Natasha.umrigar@gmail.com](mailto:Natasha.umrigar@gmail.com)

#### Sydney Research Assistant

Aimee Lowth  
9463 2926 (ph)  
9463 2099 (f)  
[Aimee.lowth@health.nsw.gov.au](mailto:Aimee.lowth@health.nsw.gov.au)
